# Supplementary material
Source: PubMed Central journal article supplement (PMC4375326)

Supplemental Figure 1. Field maps for Keur Matar (A) and Nioro (B) field site. Treatments are shrub/residue (SR) and bare soil (BS). Sample types (MR and MB) and samples by experiment (A and B) are shown as displayed in the legend.

A.

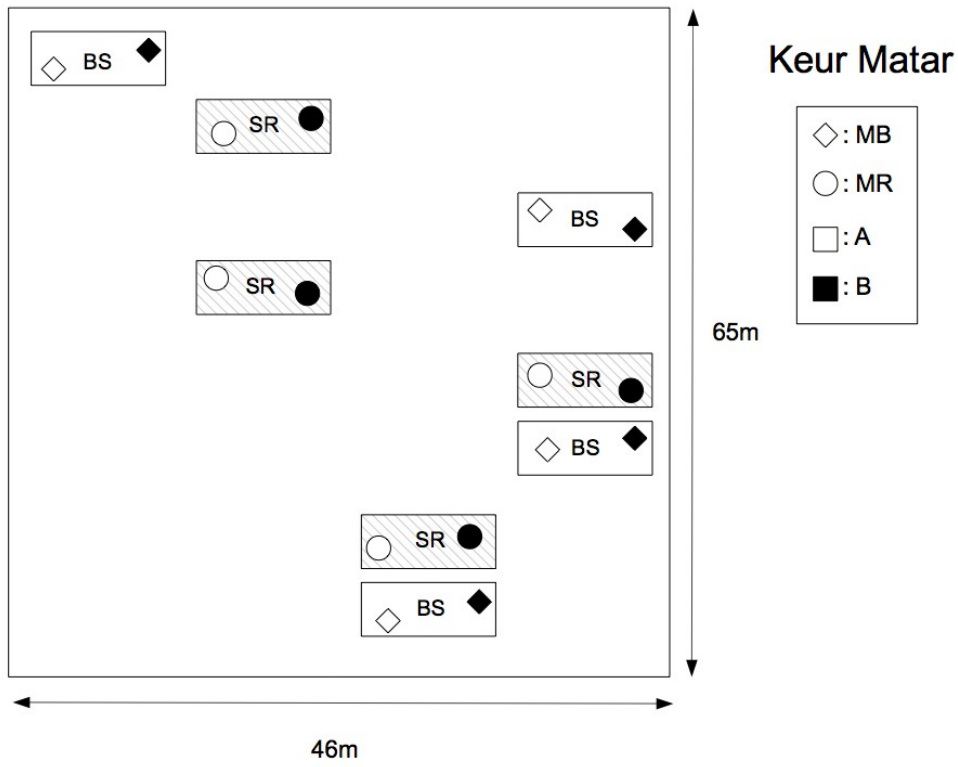

B.

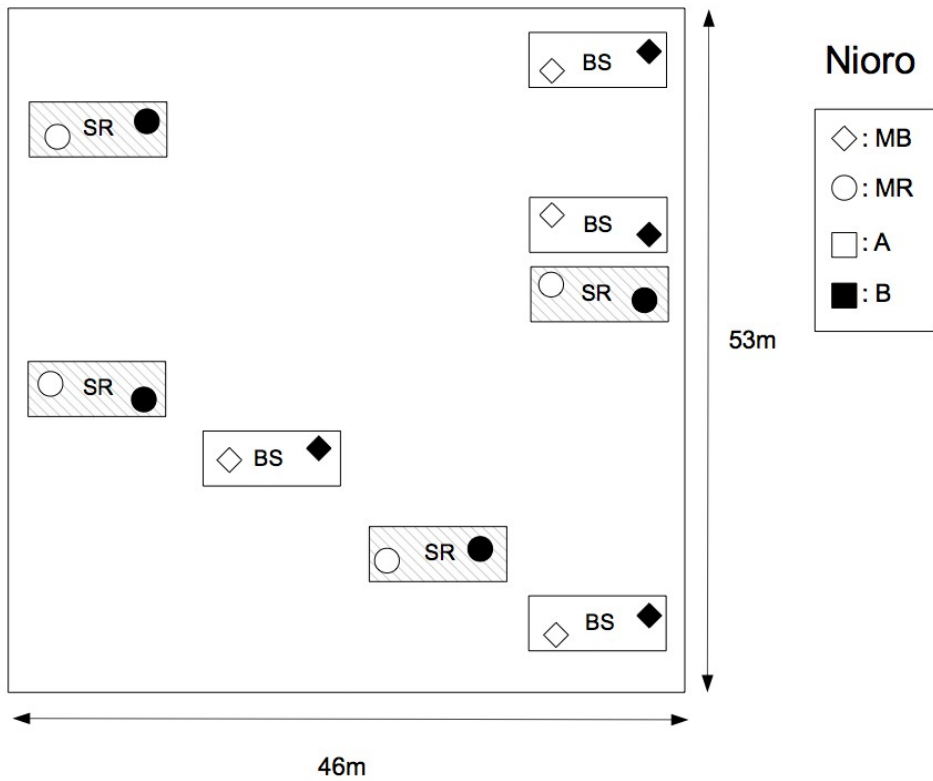

Supplement: AEM.04122-14_zam999116188so1.pdf [file AEM.04122-14_zam999116188so1.pdf]
